# Supplementary material for: Retromer-driven membrane tubulation separates endosomal recycling from Rab7/Ypt7-dependent fusion
Source: PubMed Central journal article supplement — Mol Biol Cell. 2017 Mar 15;28(6):783–91. doi: 10.1091/mbc.E16-08-0582 (PMC5349785; doi:10.1091/mbc.e16-08-0582), 2017-03-15

# Supplemental Materials

*Molecular Biology of the Cell*

Purushothaman et al.

**Figure S1: Further biochemical analyses of retromer complex and assembly.** (A) Analysis of the purified retromer subcomplex. Overproduced CSC, SNX-BAR, and SNX-BAR retromer complexes were purified as in Figure 1. Complexes were analyzed via SDS-PAGE, and gels were stained with Coomassie. (A, B) Gel filtration of retromer. TEV-eluates from IgG columns was applied to gel filtration as described in Methods. TEV indicates the migration of the tobacco etch virus protease used to elute the protein from IgG beads. The overall profile for the purified CSC (Figure 1D) is displayed in blue. (C) Competition of the N-terminal fragment of Vps5 with Ypt7. Vps5 was purified via an N-terminal His-tag (shown to left on an SDS-PAGE that was stained with Coomassie). Note that the fragment runs higher than its expected molecular weight. The protein was added at the indicated molar ratio relative to CSC to GST-Ypt7 as described in Figure 5A and Methods.

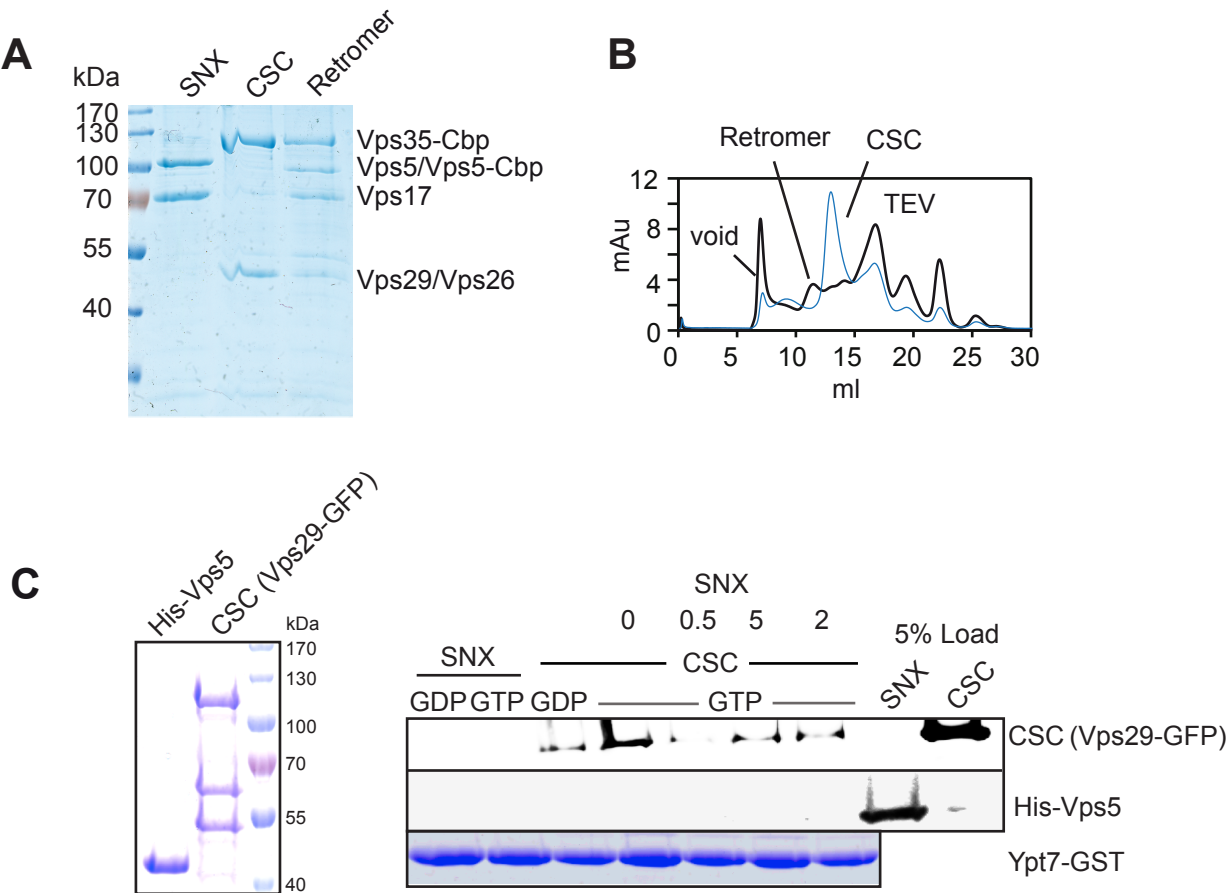

Supplement: supp_E16-08-0582v1_CombinedSupMats.pdf [file supp_E16-08-0582v1_CombinedSupMats.pdf]
